# Supplementary material for: The administration of intranasal live attenuated influenza vaccine induces changes in the nasal microbiota and nasal epithelium gene expression profiles
Source: PubMed Central journal article supplement (PMC4678663; doi:10.1186/s40168-015-0133-2), 2015-12-15

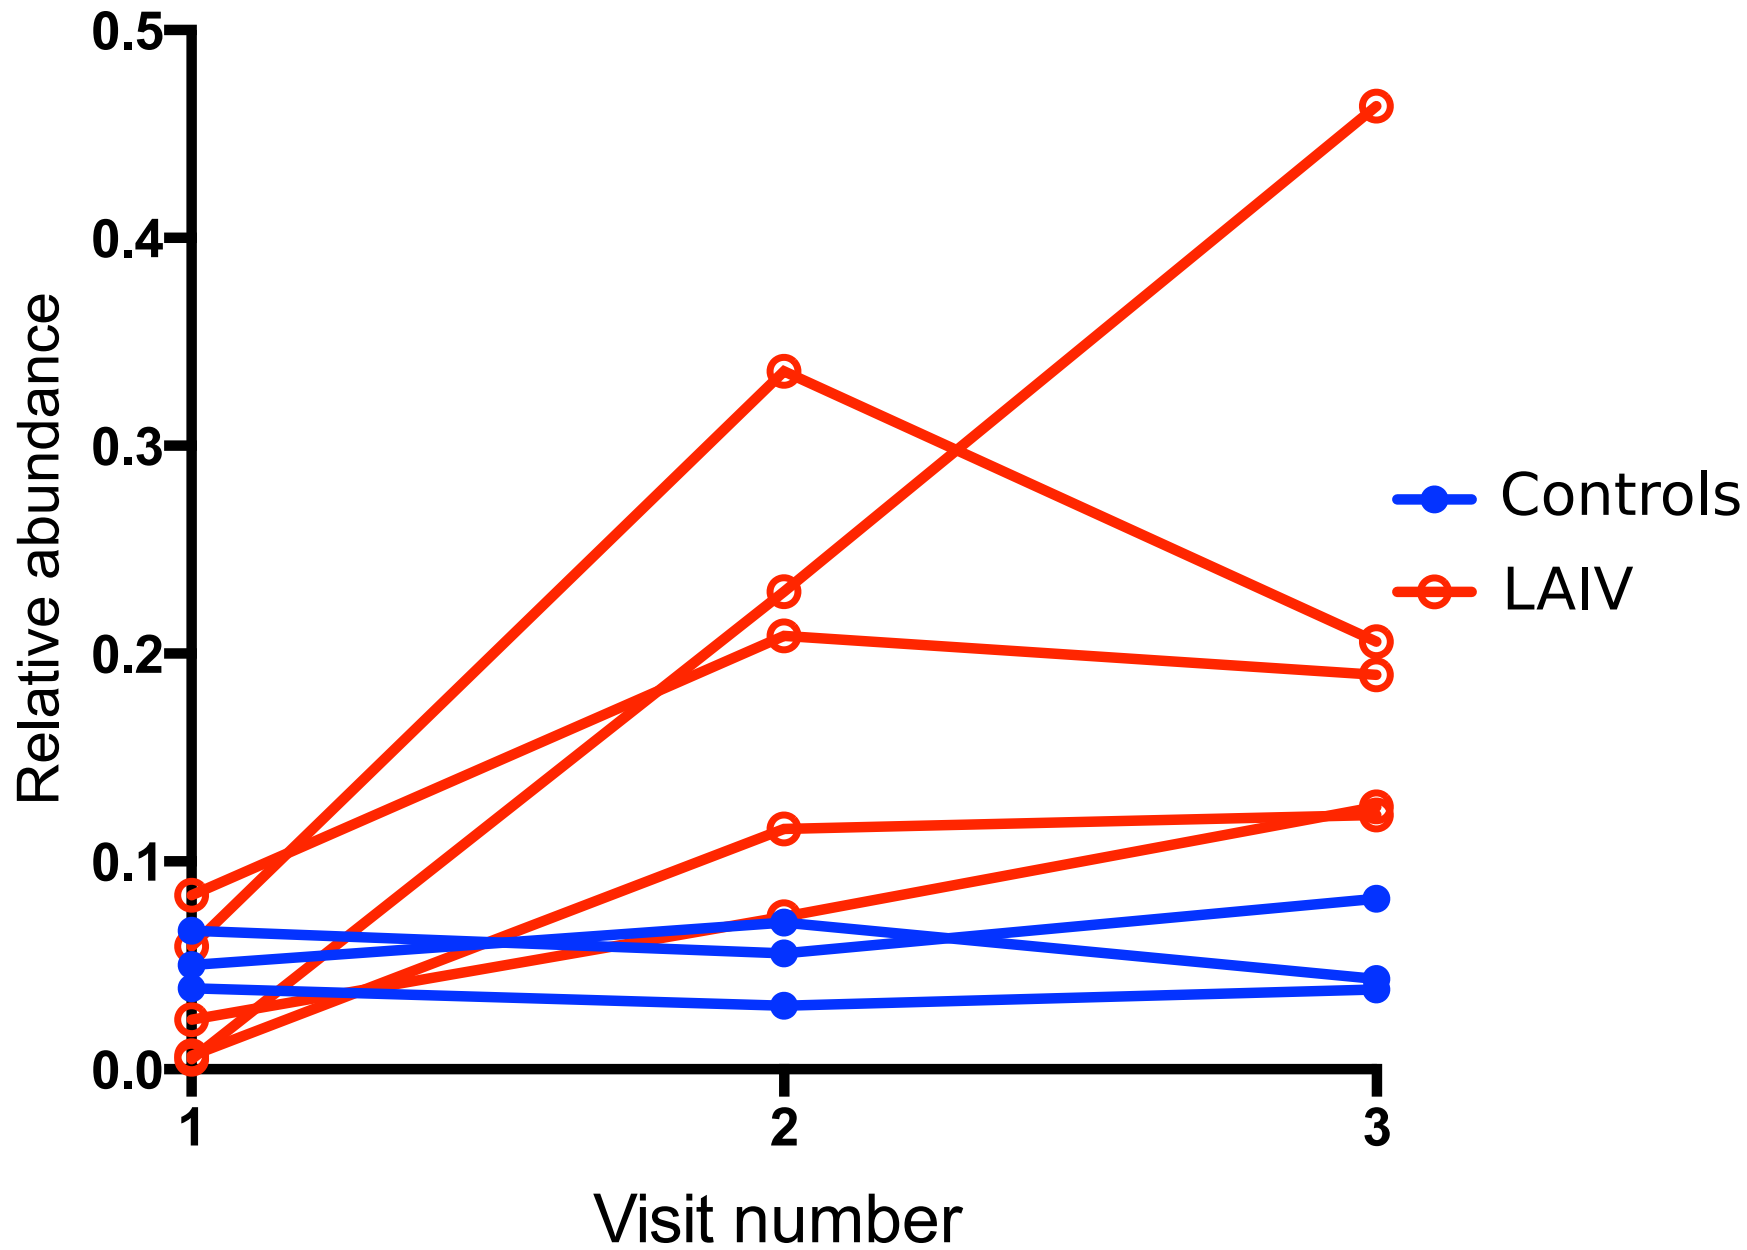

Supplement: 40168_2015_133_MOESM4_ESM.pdf [file 40168_2015_133_MOESM4_ESM.pdf]
