# Supplementary material for: The administration of intranasal live attenuated influenza vaccine induces changes in the nasal microbiota and nasal epithelium gene expression profiles
Source: PubMed Central journal article supplement (PMC4678663; doi:10.1186/s40168-015-0133-2), 2015-12-15
Supplement: 40168_2015_133_MOESM10_ESM.pdf [file 40168_2015_133_MOESM10_ESM.pdf]

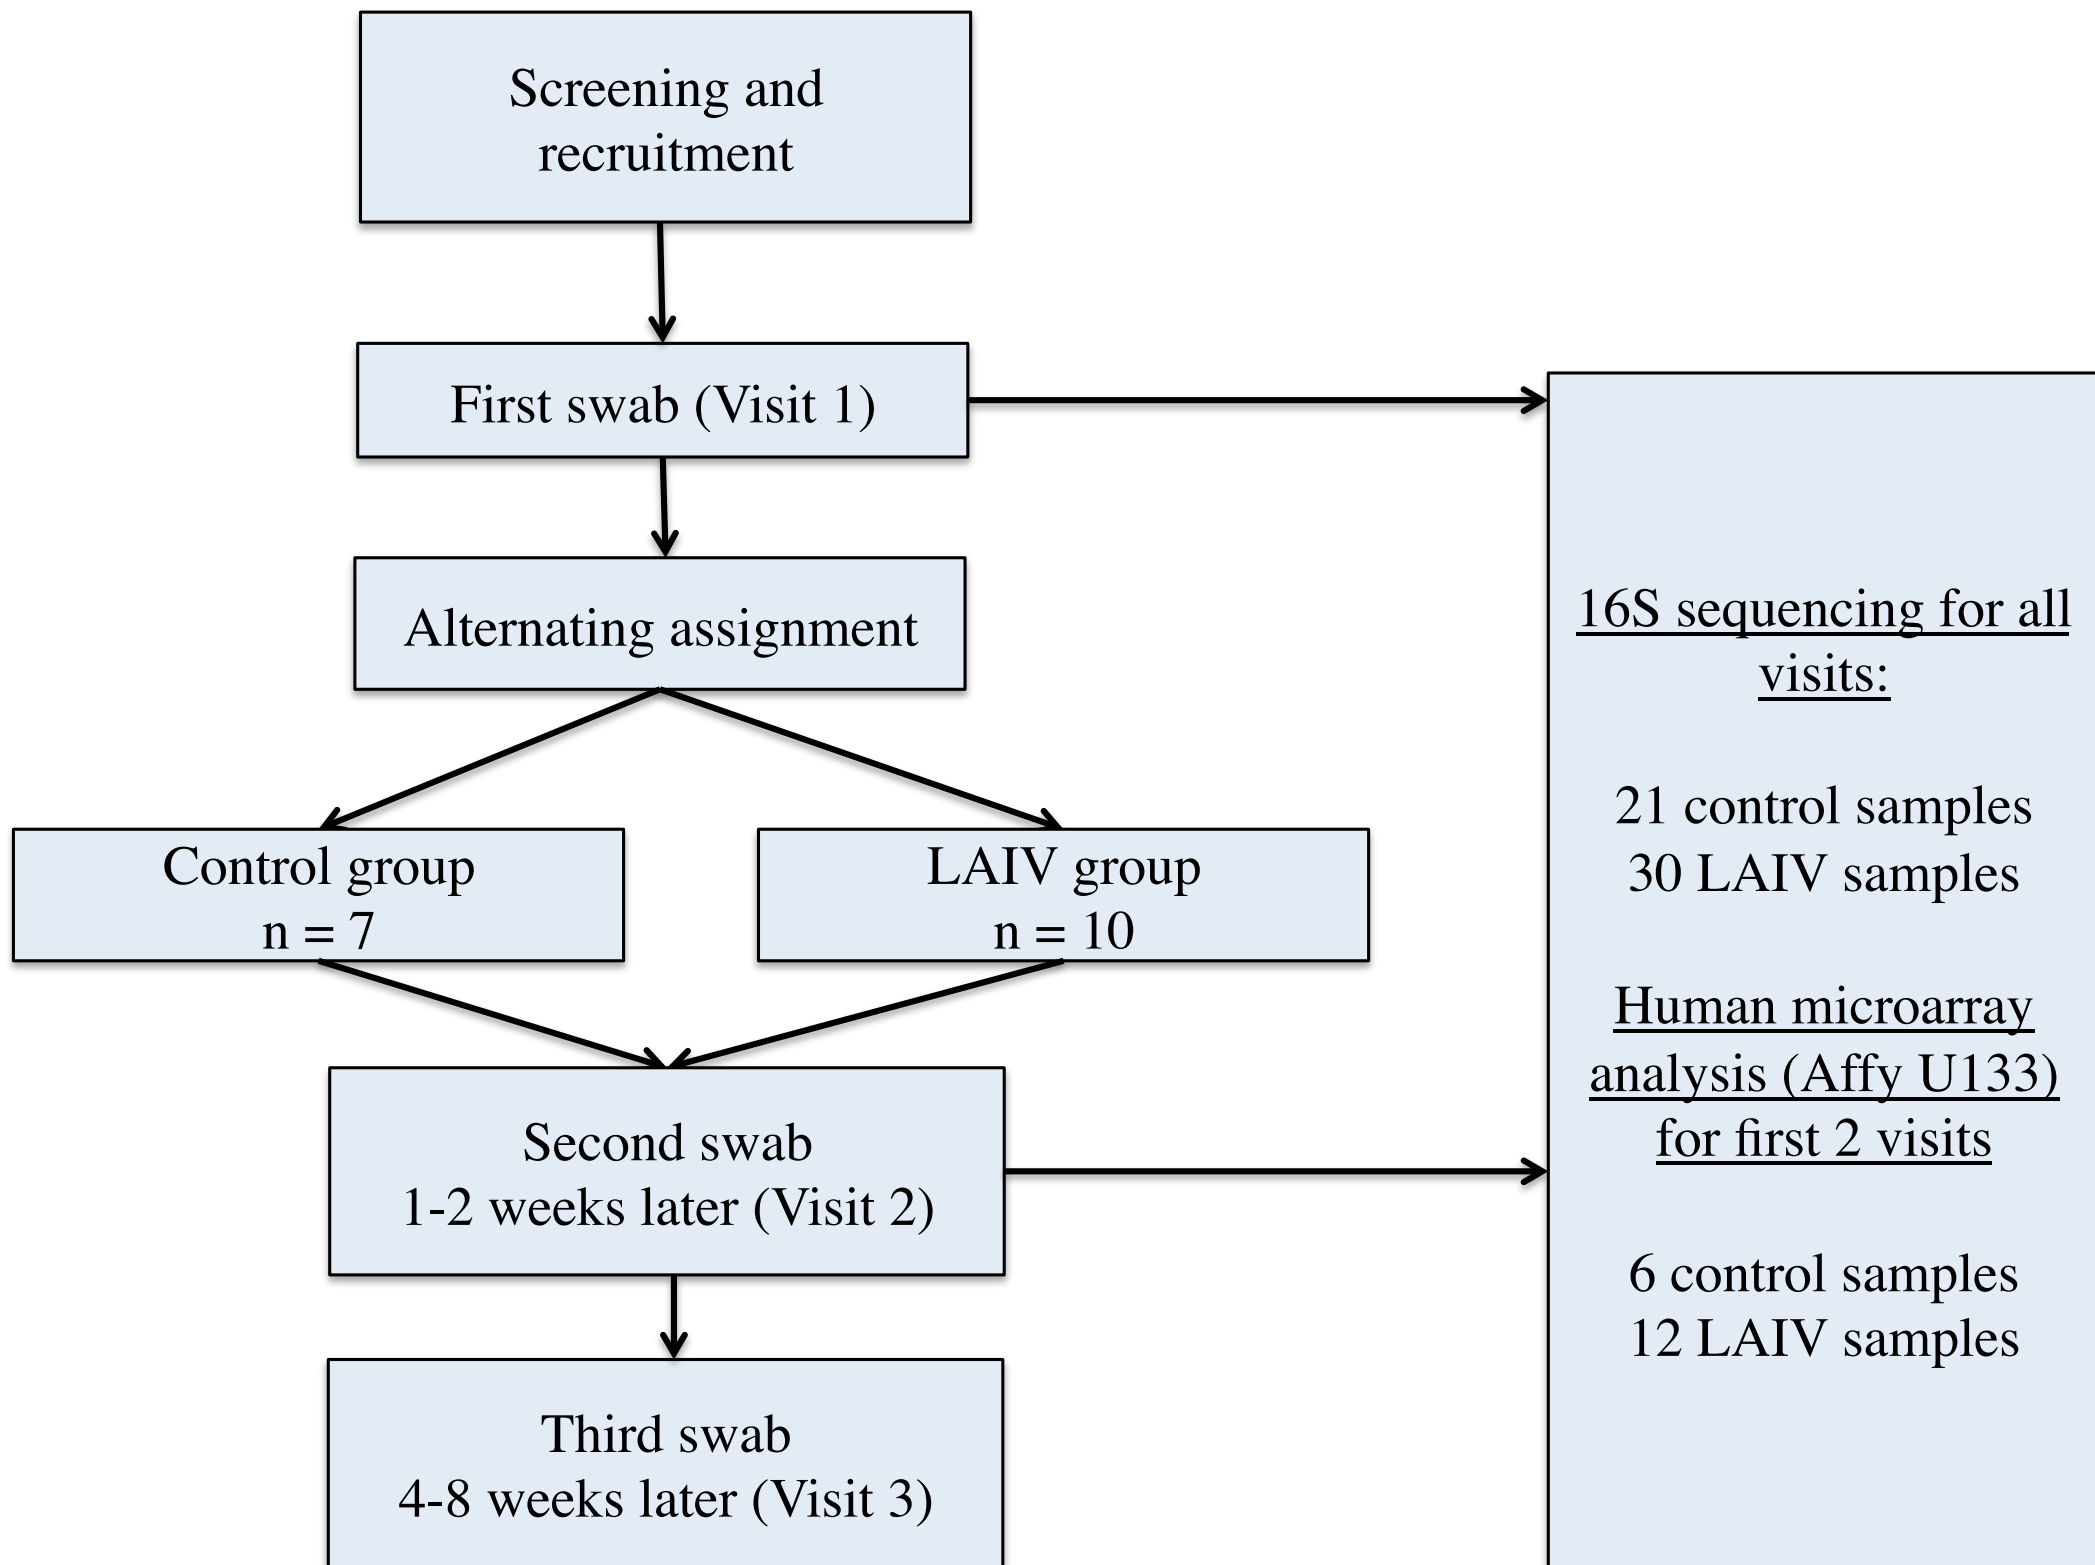

Screening and  
recruitment

First swab (Visit 1)

Alternating assignment

Control group  
n = 7

LAIV group  
n = 10

Second swab  
1-2 weeks later (Visit 2)

Third swab  
4-8 weeks later (Visit 3)

16S sequencing for all  
visits:

21 control samples  
30 LAIV samples

Human microarray  
analysis (Affy U133)  
for first 2 visits

6 control samples  
12 LAIV samples
